# Supplementary material for: Macroporous Calcium Phosphate/Chitosan Composites Prepared via Unidirectional Ice Segregation and Subsequent Freeze-Drying
Source: Materials (Basel). 2017 May 8;10(5):516. doi: 10.3390/ma10050516 (PMC5459033; doi:10.3390/ma10050516)
Supplement: Supplementary file 1 [file materials-10-00516-s001.pdf]

## Supplementary Materials: Macroporous Calcium Phosphate/Chitosan Composites Prepared via Unidirectional Ice Segregation and Subsequent Freeze-Drying

Inmaculada Aranaz, Enrique Martínez-Campos, Carolina Moreno-Vicente, Ana Civantos, S. García-Arguelles and Francisco del Monte

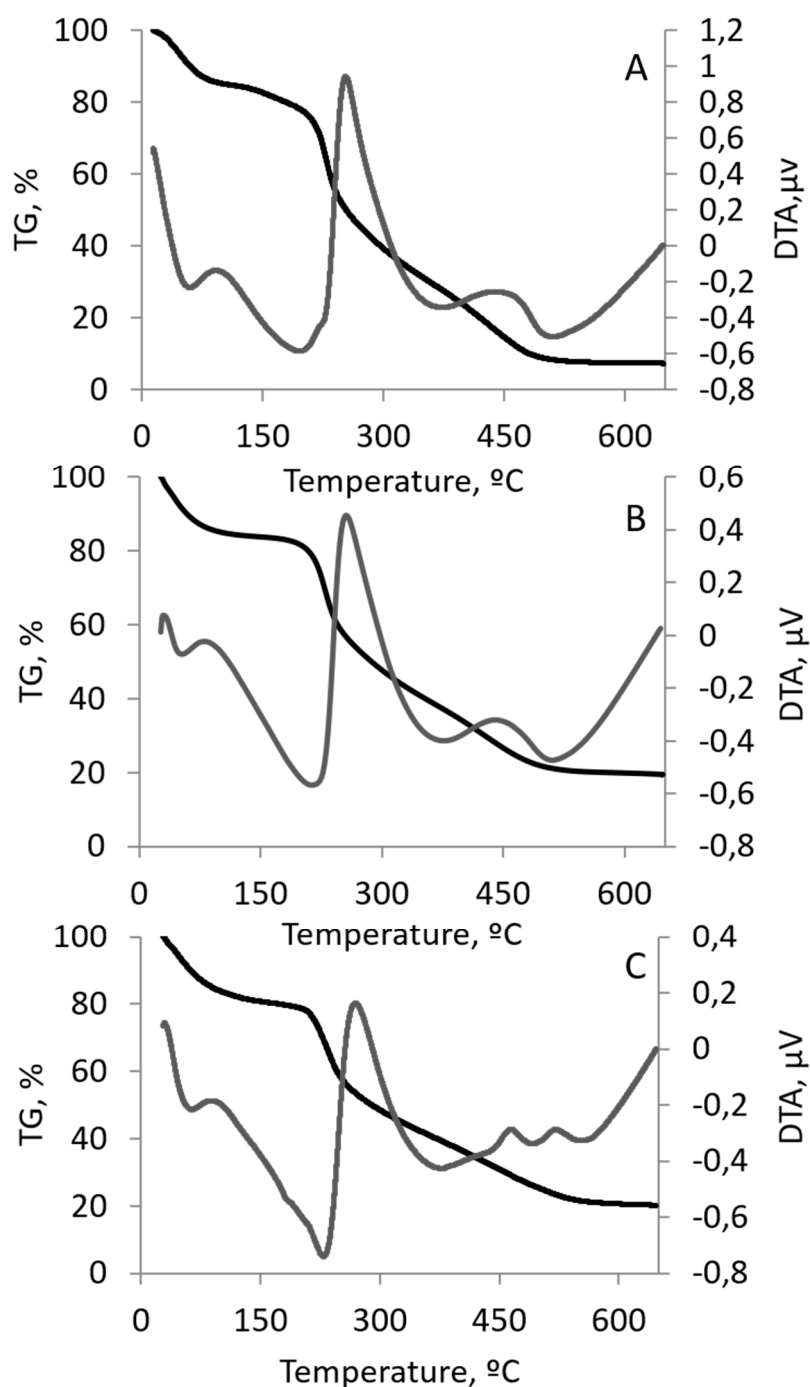

**Figure S1.** Thermogravimetric analysis of CSCaP composites. (A) CSCaP1, (B) CSCaP2 and (C) CSCaP3 samples.

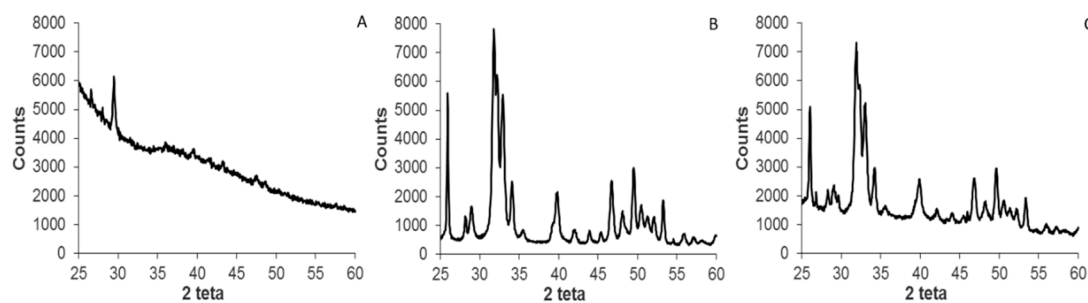

**Figure S2.** XRD pattern of (A) chitosan, (B) hydroxyapatite and (C) physical mixture of chitosan and hydroxyapatite.

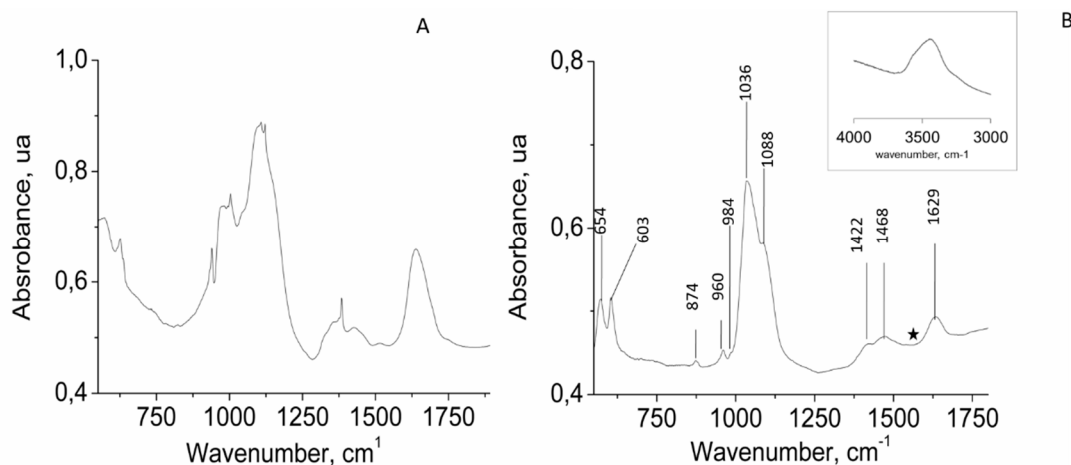

**Figure S3.** FTIR spectra of CSCaP1OP (A) and CSCaP1C (B) samples.

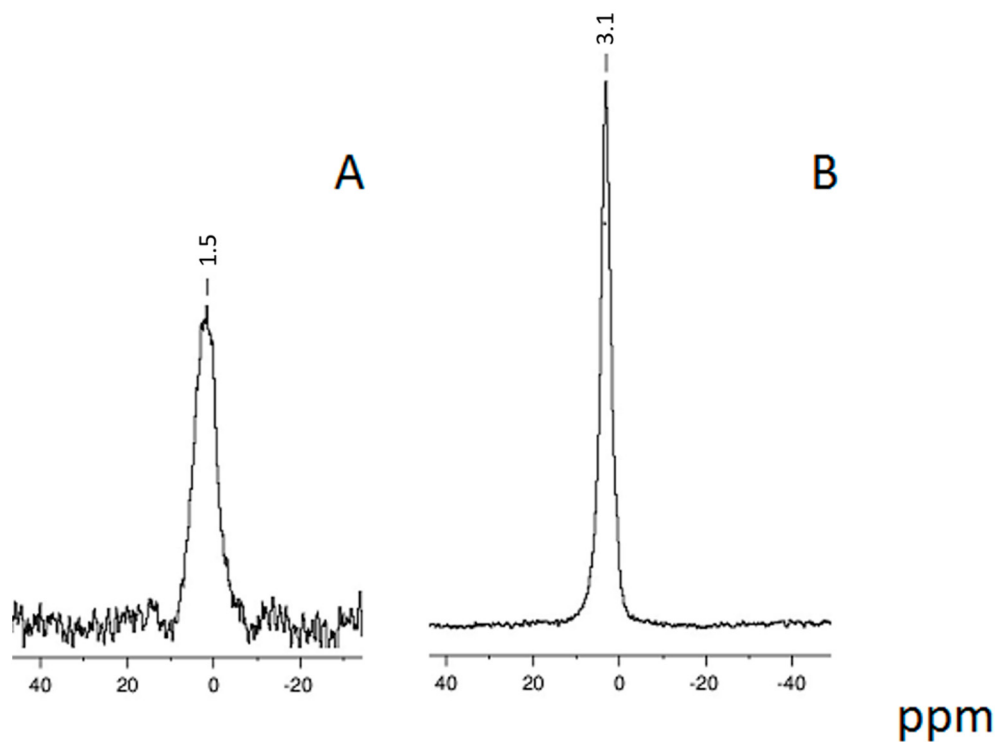

**Figure S4.** Typical  $^{31}\text{P}$  NMR spectra of CSCaP (A) and CSCaPC (B) samples.

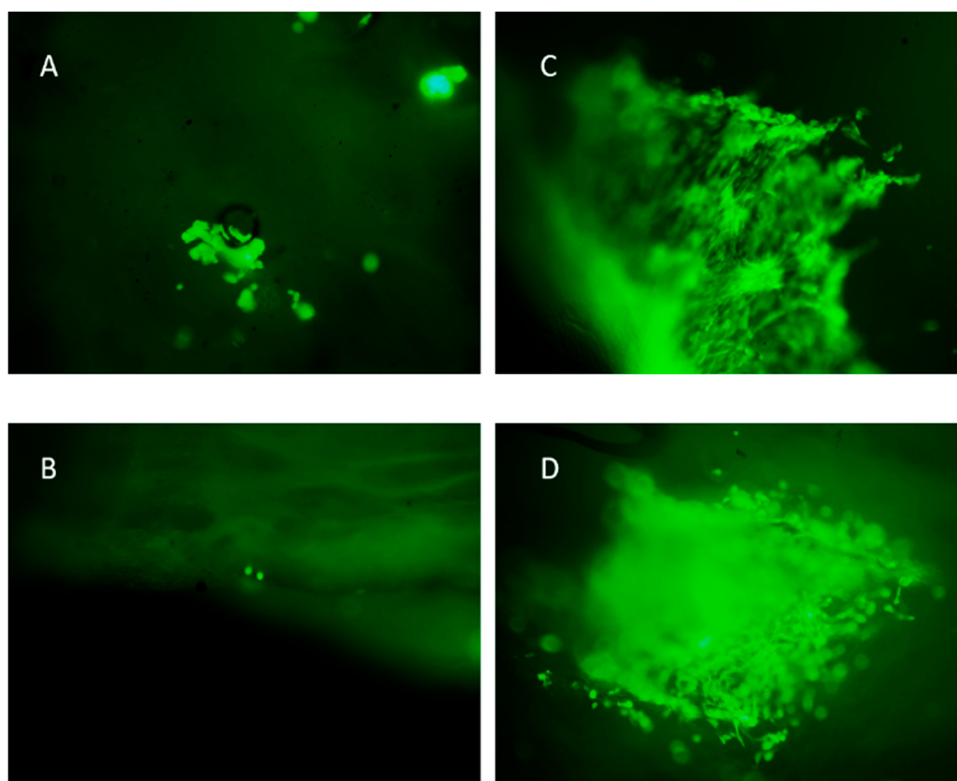

**Figure S5.** Fluorescence microscopy of premyoblastic C2C12-GFP cell culture at 7days. (A) CS scaffold, (B) CSCaP1 composite; (C) CSCaP2 composite and (D) CSCaP3 composite.

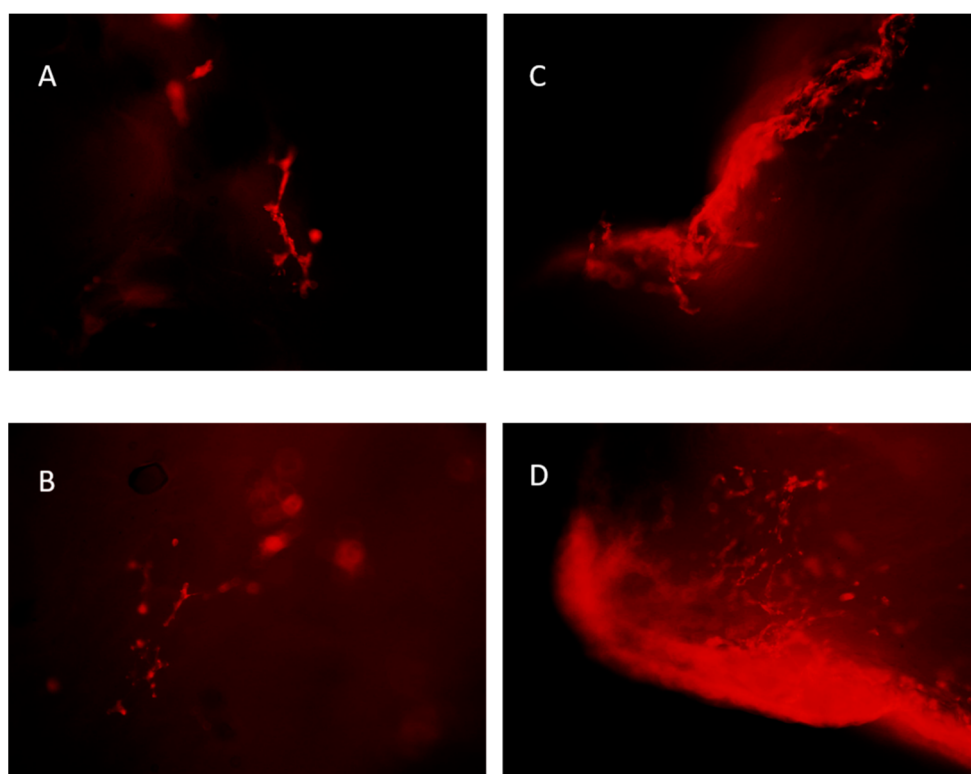

**Figure S6.** Actin staining of osteoblastic MC3T3 cell culture at 7 days. (A) CS scaffold, (B) CSCaP1 composite; (C) CSCaP2 composite and (D) CSCaP3 composite.
